# Supplementary material
Source: Royal Society of Chemistry journal article supplement (doi:10.1039/d6tb00150e)
Supplement: d6tb00150e1.pdf [file d6tb00150e1.pdf]

Supplementary Information Associated with

# Unraveling the therapeutic potentials of a thiosemicarbazone based Zn(II) metal-organic triangle complex

Ansa Santu<sup>a</sup>, K. Sreekanth<sup>b,c</sup>, M.K. Sarath Josh<sup>d</sup>, E.K. Radhakrishnan<sup>b,c</sup>, E. Manoj<sup>a\*</sup>

<sup>a</sup>*Department of Applied Chemistry, CUSAT, Kochi, Kerala 682 022, India*

<sup>b</sup>*School of Biosciences, Mahatma Gandhi University; P.D Hills (P.O), Kottayam, Kerala 686 560, India*

<sup>c</sup>*Dr. N. Radhakrishnan International Centre for Medical Innovation (NRICMI), Mahatma Gandhi University; P.D Hills (P.O), Kottayam, Kerala 686 560, India*

<sup>d</sup>*School of Energy Materials, Mahatma Gandhi University; P.D Hills (P.O), Kottayam, Kerala 686 560, India*

Email: \*[manoj@cusat.ac.in](mailto:manoj@cusat.ac.in)

| Sl. No. | Contents                                                                                                                                                                     | Page no. |
|---------|------------------------------------------------------------------------------------------------------------------------------------------------------------------------------|----------|
| 1       | <b>Figure S1.</b> Packing diagram of complex <b>1</b> along the b-axis showing hydrogen bonding interactions.                                                                | S5       |
| 2       | <b>Figure S2.</b> Packing of complex <b>1</b> showing molecules are packed along the a-axis and the formation of 3D motif through hydrogen bonding and other short contacts. | S5       |
| 3       | <b>Figure S3.</b> Experimental (left) and theoretical (right) IR spectra of the ligand H <sub>2</sub> L.                                                                     | S5       |
| 4       | <b>Figure S4.</b> Experimental (left) and theoretical (right) IR spectra of the complex <b>1</b> .                                                                           | S6       |
| 5       | <b>Figure S5.</b> Experimental (left) and theoretical (right) Far IR spectra of the complex <b>1</b> .                                                                       | S6       |
| 6       | <b>Figure S6.</b> UV-vis spectra of ligand H <sub>2</sub> L and the complex <b>1</b> in 10 <sup>-5</sup> M DMF solution.                                                     | S6       |
| 7       | <b>Figure S7.</b> UV-vis diffuse reflectance spectrum of H <sub>2</sub> L. Inset shows the band gap calculations.                                                            | S7       |
| 8       | <b>Figure S8.</b> UV-vis diffuse reflectance spectrum of complex <b>1</b> . Inset shows the band gap calculations.                                                           | S7       |
| 9       | <b>Figure S9.</b> Solid state emission spectrum of H <sub>2</sub> L ( $\lambda_{exc} = 307$ nm). Inset shows the photographs under daylight and UV light.                    | S7       |
| 10      | <b>Figure S10.</b> Time resolved fluorescence decay curve of the ligand H <sub>2</sub> L.                                                                                    | S8       |
| 11      | <b>Figure S11.</b> 2D Fingerprint plots showing the percentages of contacts contributed to the total Hirshfeld surface area of the complex <b>1</b> .                        | S8       |
| 12      | <b>Figure S12.</b> Relative contributions of various intermolecular contacts to the Hirshfeld surface area in complex <b>1</b> .                                             | S8       |
| 13      | <b>Figure S13.</b> Optimized geometries of (a) H <sub>2</sub> L, (b) H <sub>2</sub> L-keto, (c) complex <b>1</b> .                                                           | S9       |

|    |                                                                                                                                                                                                                                                                                                                                                          |     |
|----|----------------------------------------------------------------------------------------------------------------------------------------------------------------------------------------------------------------------------------------------------------------------------------------------------------------------------------------------------------|-----|
| 14 | <b>Figure S14.</b> (a) Frontier molecular orbitals, (b) MEP plots of H <sub>2</sub> L, H <sub>2</sub> L-keto, complex <b>1</b> .                                                                                                                                                                                                                         | S9  |
| 15 | <b>Figure S15.</b> Time dependent absorption spectra of complex <b>1</b> in buffer solution at pH =7.4.                                                                                                                                                                                                                                                  | S10 |
| 16 | <b>Figure S16.</b> Zone of inhibition of the ligand H <sub>2</sub> L against (a) <i>S. aureus</i> , (b) <i>E. coli</i> , (c) <i>K. pneumoniae</i> , (d) <i>S. typhi</i> . (e) <i>P. mirabilis</i> .                                                                                                                                                      | S10 |
| 17 | <b>Figure S17.</b> Zone of inhibition of the complex <b>1</b> against (a) <i>S. aureus</i> , (b) <i>E. coli</i> , (c) <i>K. pneumoniae</i> , (d) <i>S. typhi</i> . (e) <i>P. mirabilis</i> .                                                                                                                                                             | S11 |
| 18 | <b>Figure S18.</b> MIC determination against <i>S. aureus</i> of ligand H <sub>2</sub> L (top left), complex <b>1</b> (top right), <i>E. coli</i> of complex <b>1</b> (middle left), <i>K. pneumoniae</i> of complex <b>1</b> (middle right), <i>S. typhi</i> of complex <b>1</b> (bottom left), <i>P. mirabilis</i> of complex <b>1</b> (bottom right). | S11 |
| 19 | <b>Figure S19.</b> Morphological changes induced by H <sub>2</sub> L and complex <b>1</b> against MCF7 cell lines compared with cisplatin at 100 µg/mL.                                                                                                                                                                                                  | S12 |
| 20 | <b>Figure S20.</b> Assessment of HEK 293 cell survival in the presence of complex <b>1</b> , conducted by treating the cells with different concentrations. (*) indicate p < 0.001 when compared to control group.                                                                                                                                       | S12 |
| 21 | <b>Figure S21.</b> Fluorescent intensity plot of DCFDA/DCF assay performed for the detection of ROS generation in MCF7 cells by complex <b>1</b> compared with untreated control.                                                                                                                                                                        | S13 |
| 22 | <b>Figure S22.</b> Binding mode of [Zn <sub>3</sub> (µ-L) <sub>3</sub> •3DMF] ( <b>1</b> ) and its focused view of interactions with 1BNA.                                                                                                                                                                                                               | S13 |
| 23 | <b>Figure S23.</b> Binding mode of [Zn <sub>3</sub> (µ-L) <sub>3</sub> •3DMF] ( <b>1</b> ) and its focused view of interactions with 1HNJ.                                                                                                                                                                                                               | S13 |
| 24 | <b>Figure S24.</b> Binding mode of [Zn <sub>3</sub> (µ-L) <sub>3</sub> •3DMF] ( <b>1</b> ) and its focused view of interactions with 1HSK.                                                                                                                                                                                                               | S14 |
| 25 | <b>Figure S25.</b> 2D representation of [Zn <sub>3</sub> (µ-L) <sub>3</sub> •3DMF] ( <b>1</b> ) with the active site residues of (a) 1BNA, (b) 1HNJ, (c) 1HSK and (d) 3HB5.                                                                                                                                                                              | S14 |
| 26 | <b>Figure S26.</b> MD simulation profile of the Complex <b>1</b> -1HNJ system over 100 ns (a) RMSD (b) Rg (c) SASA (d) RMSF (e) hydrogen bonds (f) interaction energy.                                                                                                                                                                                   | S15 |
| 27 | <b>Figure S27.</b> MD simulation profile of the Complex <b>1</b> -1HSK system                                                                                                                                                                                                                                                                            | S16 |

|    |                                                                                                                                           |     |
|----|-------------------------------------------------------------------------------------------------------------------------------------------|-----|
|    | over 100 ns (a) RMSD (b) Rg (c) SASA (d) RMSF (e) hydrogen bonds (f) interaction energy.                                                  |     |
| 28 | <b>Figure S28.</b> <sup>1</sup> H NMR spectrum of H <sub>2</sub> L.                                                                       | S16 |
| 29 | <b>Figure S29.</b> <sup>13</sup> C NMR spectrum of H <sub>2</sub> L.                                                                      | S17 |
| 30 | <b>Figure S30.</b> Mass spectrum of H <sub>2</sub> L.                                                                                     | S17 |
| 31 | <b>Table S1.</b> The bond lengths (Å) and bond angles (°) of the complex [Zn <sub>3</sub> (μ-L) <sub>3</sub> .3DMF] ( <b>1</b> ).         | S17 |
| 32 | <b>Table S2.</b> Interaction parameters of the complex [Zn <sub>3</sub> (μ-L) <sub>3</sub> .3DMF] ( <b>1</b> ).                           | S18 |
| 33 | <b>Table S3.</b> The Frontier molecular orbital energies and calculated chemical reactivity parameters for the ligand and complex.        | S19 |
| 34 | <b>Table S4.</b> Results of the inhibitory zones of the ligand and complex <b>1</b> .                                                     | S20 |
| 35 | <b>Table S5.</b> The percentage of cell viability of MCF-7 cell with the concentrations of ligand H <sub>2</sub> L and complex <b>1</b> . | S20 |
| 36 | <b>Table S6.</b> Physicochemical properties and in silico ADMET profile of <b>1</b> .                                                     | S20 |

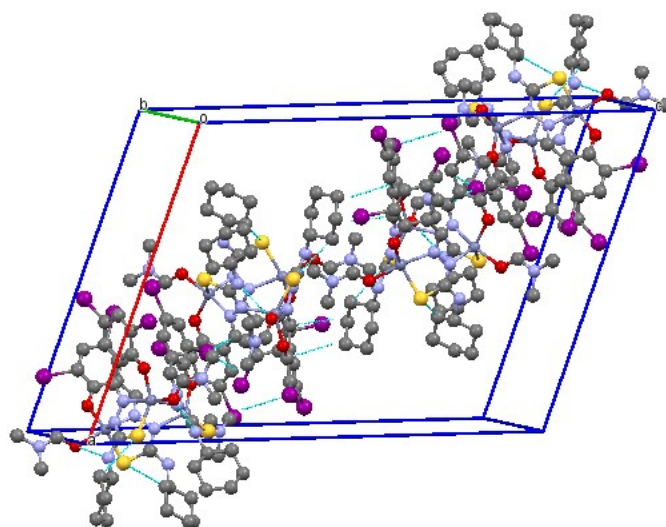

Figure S1. Packing diagram of complex **1** along the b-axis showing hydrogen bonding interactions.

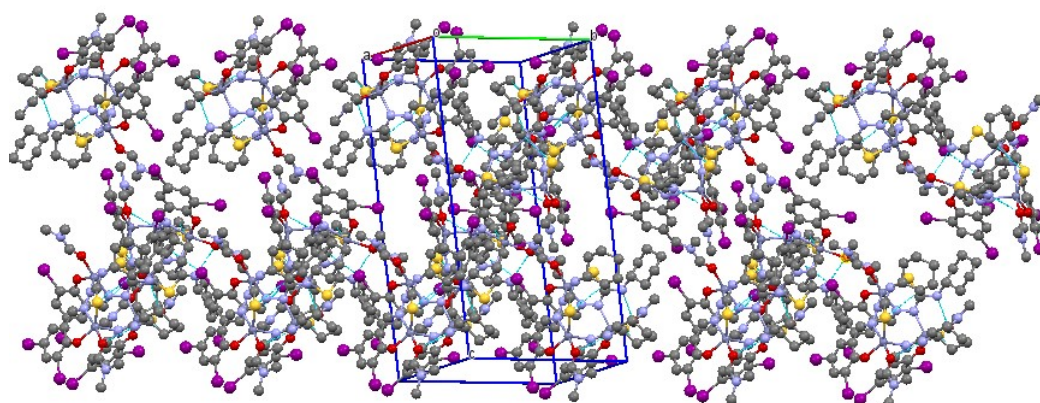

Figure S2. Packing of complex **1** showing molecules are packed along the a-axis and the formation of 3D motif through hydrogen bonding and other short contacts.

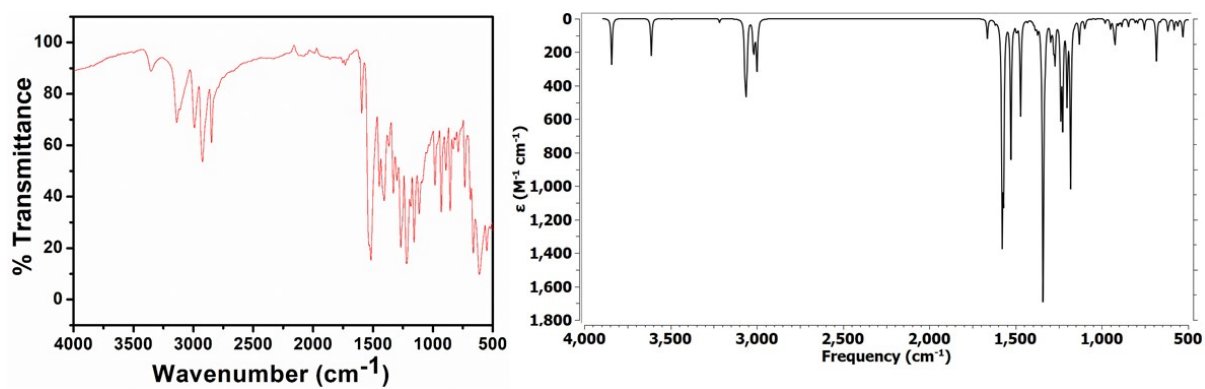

Figure S3. Experimental (left) and theoretical (right) IR spectra of the ligand H<sub>2</sub>L.

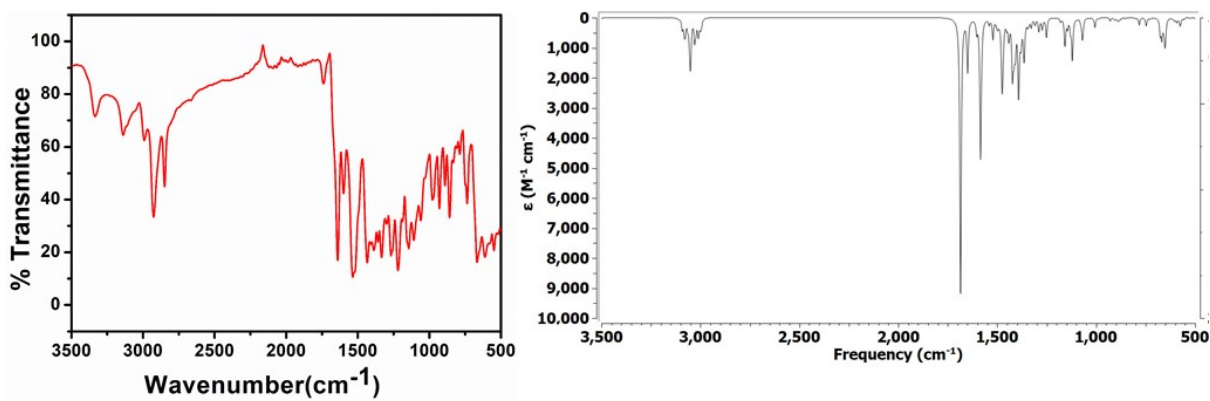

Figure S4. Experimental (left) and theoretical (right) IR spectra of the complex **1**.

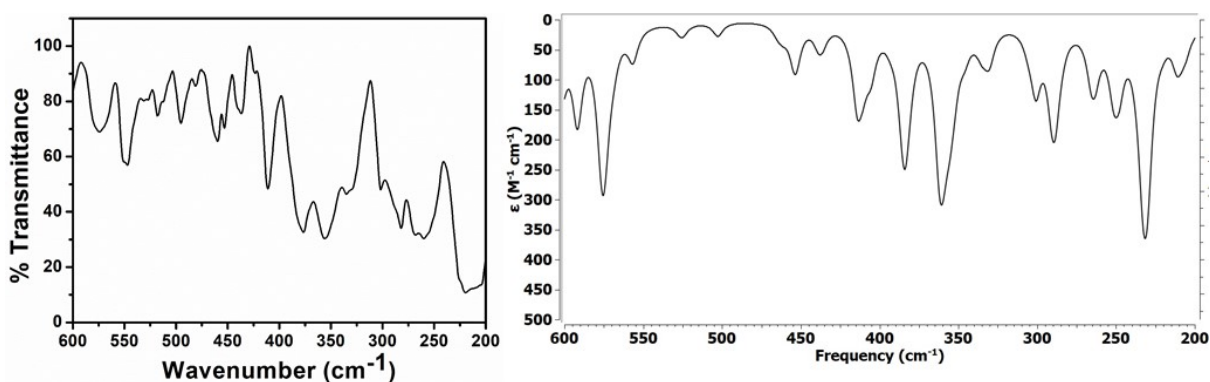

Figure S5. Experimental (left) and theoretical (right) Far IR spectra of the complex **1**.

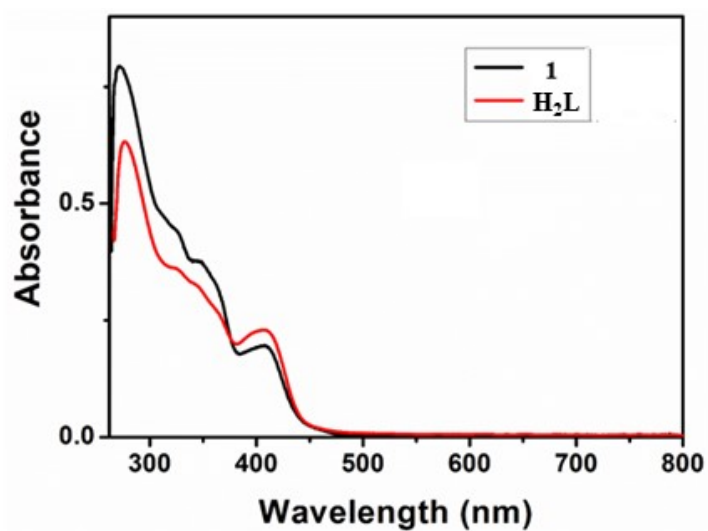

Figure S6. UV-vis spectra of ligand H<sub>2</sub>L and the complex **1** in 10<sup>-5</sup> M DMF solution.

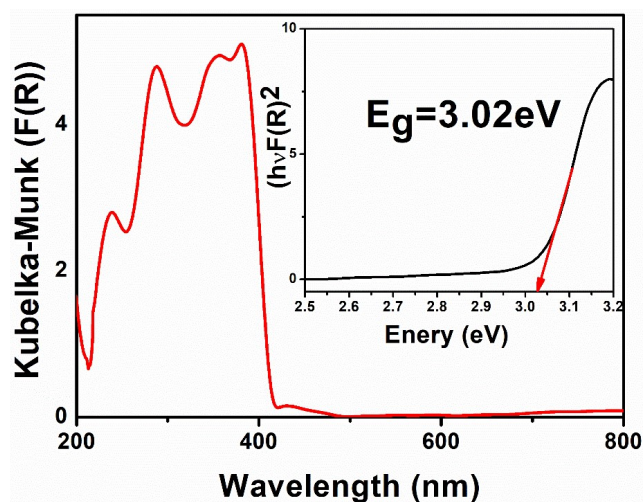

Figure S7. UV-vis diffuse reflectance spectrum of H<sub>2</sub>L. Inset shows the band gap calculations.

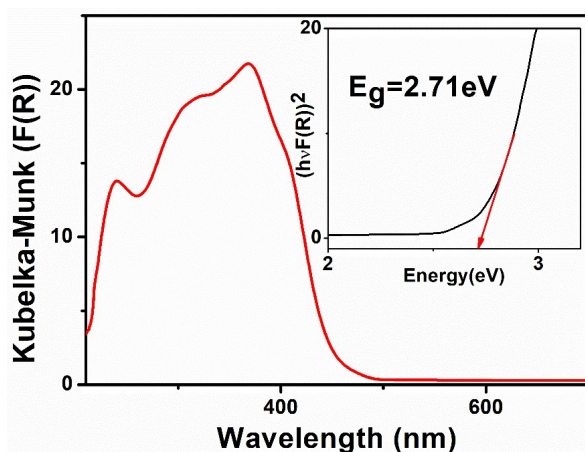

Figure S8. UV-vis diffuse reflectance spectrum of complex 1. Inset shows the band gap calculations.

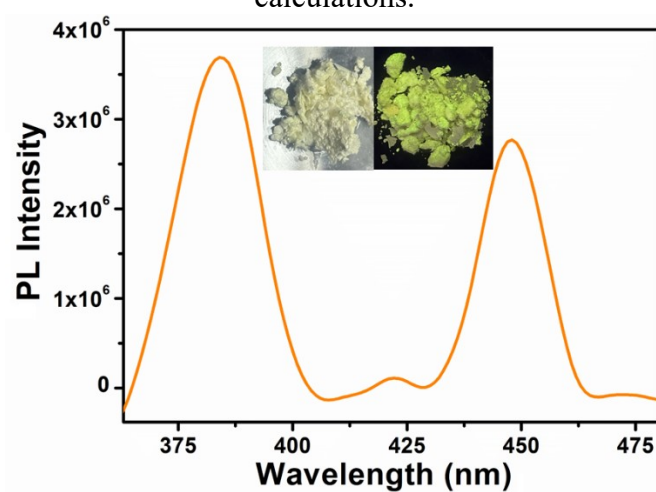

Figure S9. Solid state emission spectrum of H<sub>2</sub>L ( $\lambda_{\text{exc}} = 307 \text{ nm}$ ). Inset shows the photographs under daylight and UV light.

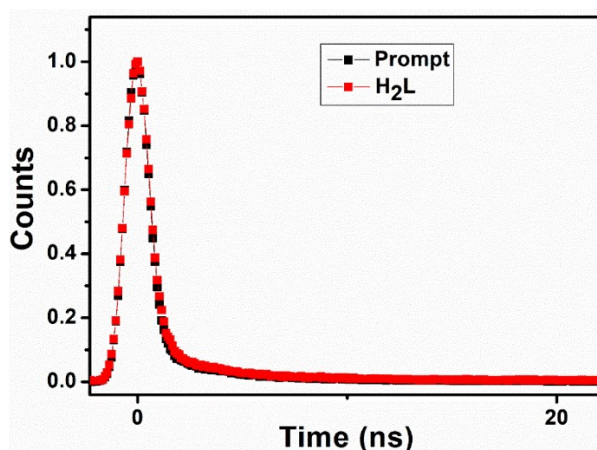

Figure S10. Time resolved fluorescence decay curve of the ligand H<sub>2</sub>L.

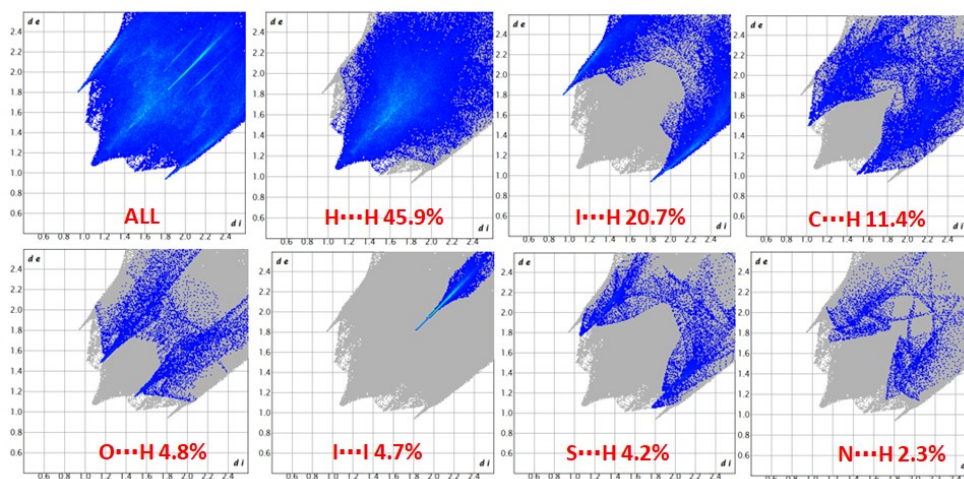

Figure S11. 2D Fingerprint plots showing the percentages of contacts contributed to the total Hirshfeld surface area of the complex **1**.

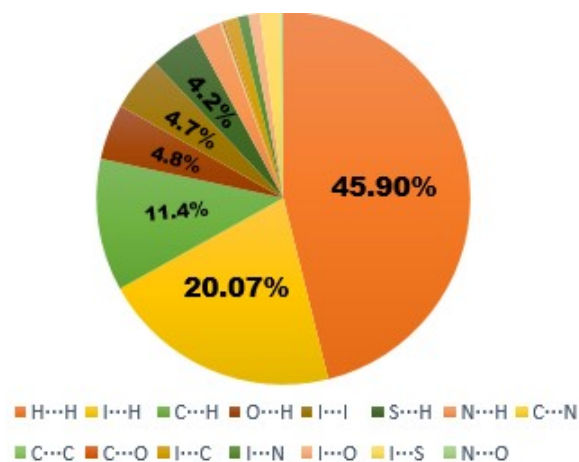

Figure S12. Relative contributions of various intermolecular contacts to the Hirshfeld surface area in complex **1**.

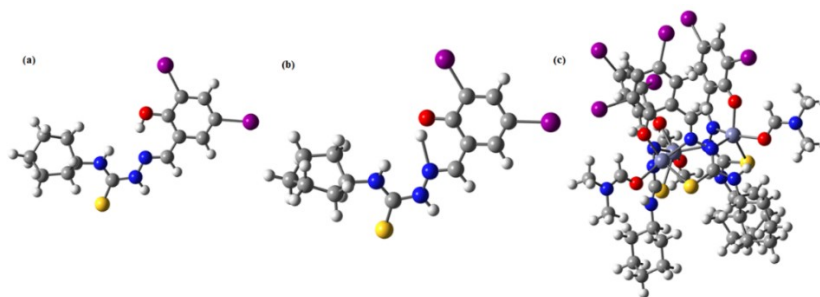

Figure S13. Optimized geometries of (a) H<sub>2</sub>L, (b) H<sub>2</sub>L-keto, (c) complex 1.

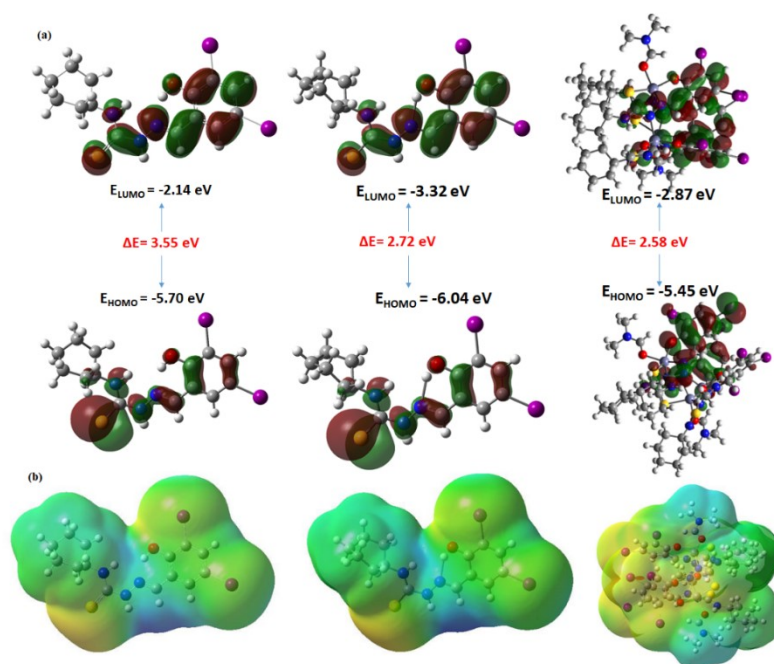

Figure S14. (a) Frontier molecular orbitals, (b) MEP plots of H<sub>2</sub>L, H<sub>2</sub>L-keto, complex 1.

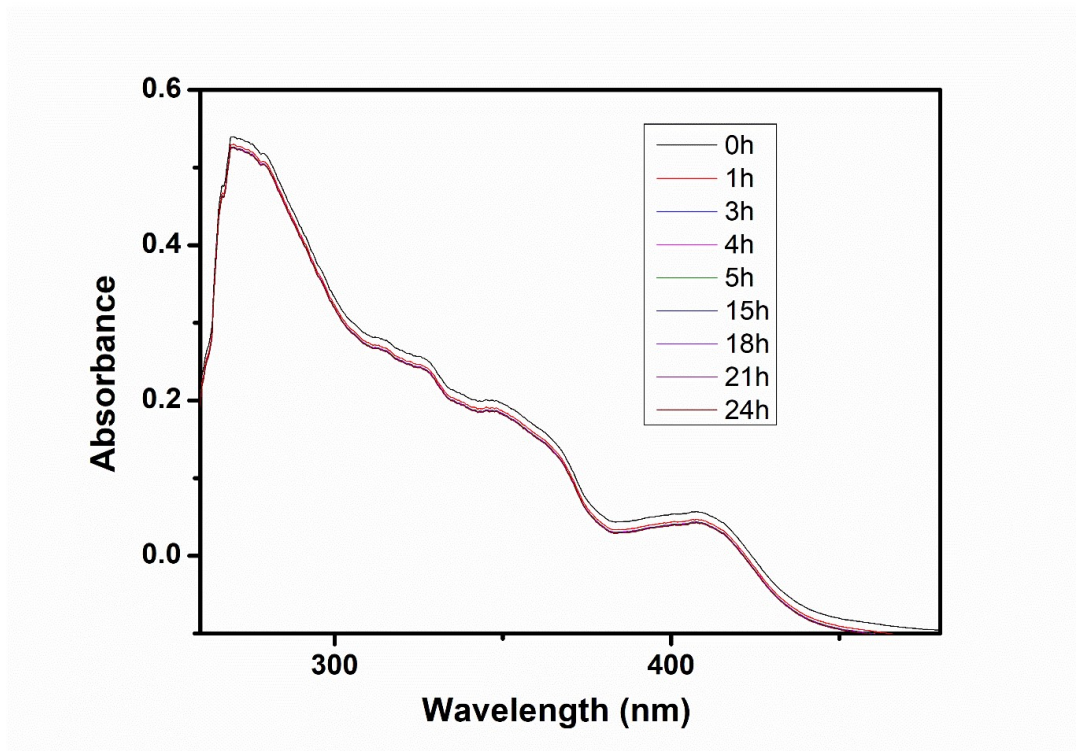

Figure S15. Time dependent absorption spectra of complex 1 in buffer solution at pH =7.4.

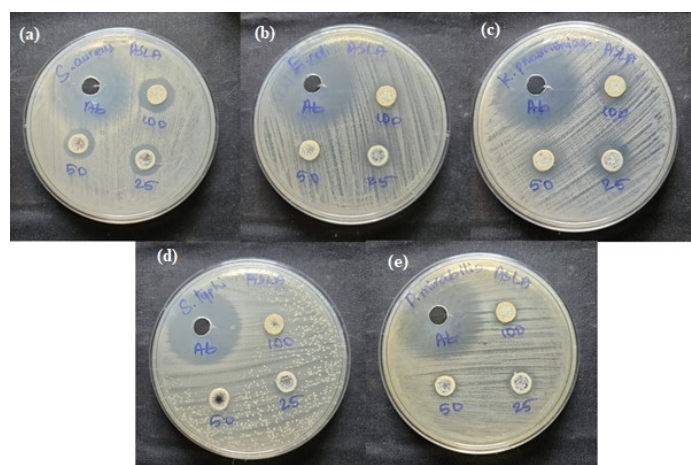

Figure S16. Zone of inhibition of the ligand H<sub>2</sub>L against (a) *S. aureus*, (b) *E. coli*, (c) *K. pneumoniae*, (d) *S. typhi*. (e) *P. mirabilis*.

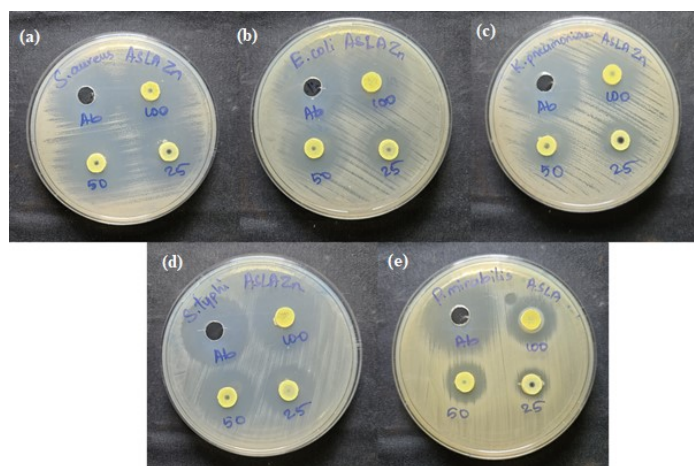

Figure S17. Zone of inhibition of the complex 1 against (a) *S. aureus*, (b) *E. coli*, (c) *K. pneumoniae*, (d) *S. typhi*. (e) *P. mirabilis*.

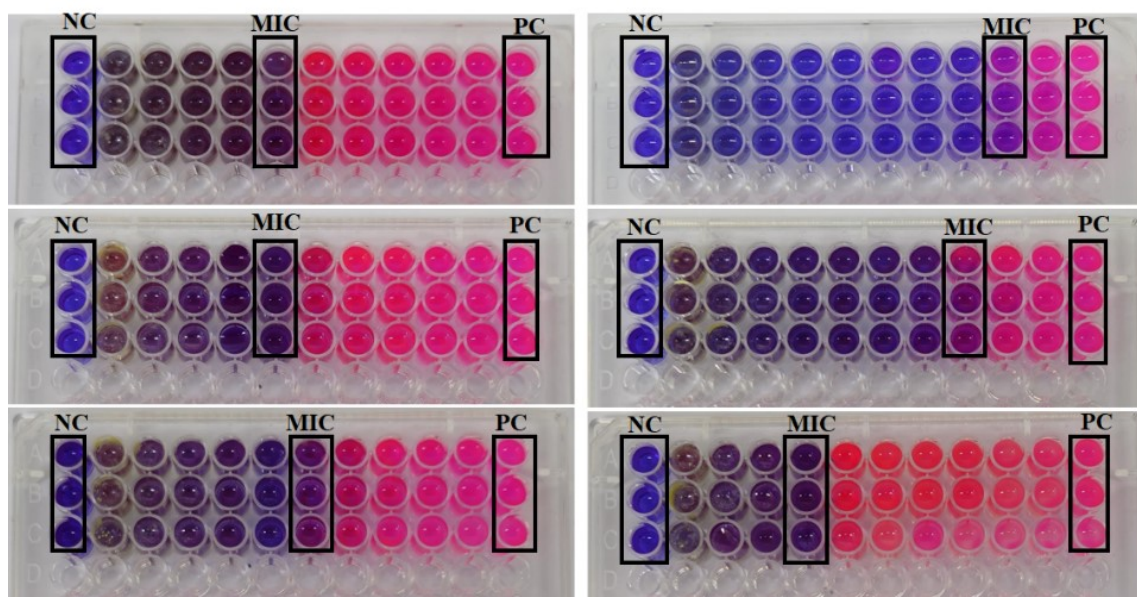

Figure S18. MIC determination against *S. aureus* of ligand H<sub>2</sub>L (top left), complex 1 (top right), *E. coli* of complex 1 (middle left), *K. pneumoniae* of complex 1 (middle right), *S. typhi* of complex 1 (bottom left), *P. mirabilis* of complex 1 (bottom right).

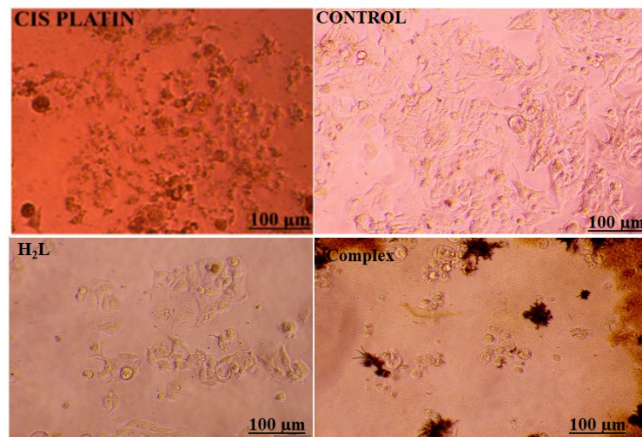

Figure S19. Morphological changes induced by H<sub>2</sub>L and complex **1** against MCF7 cell lines compared with cisplatin at 100 µg/mL.

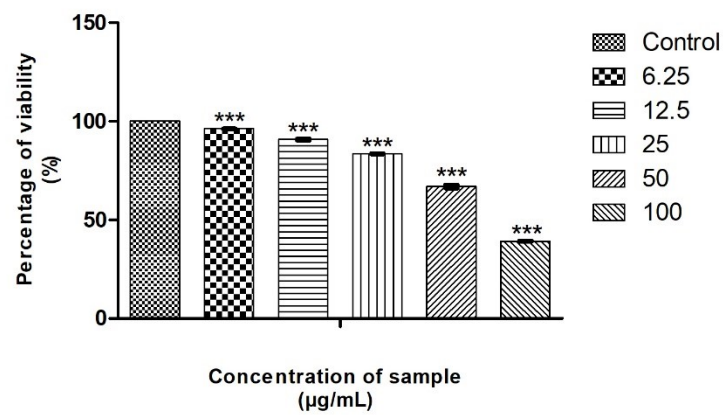

Figure S20. Assessment of HEK 293 cell survival in the presence of complex **1**, conducted by treating the cells with different concentrations. (\*) indicate  $p < 0.001$  when compared to control group.

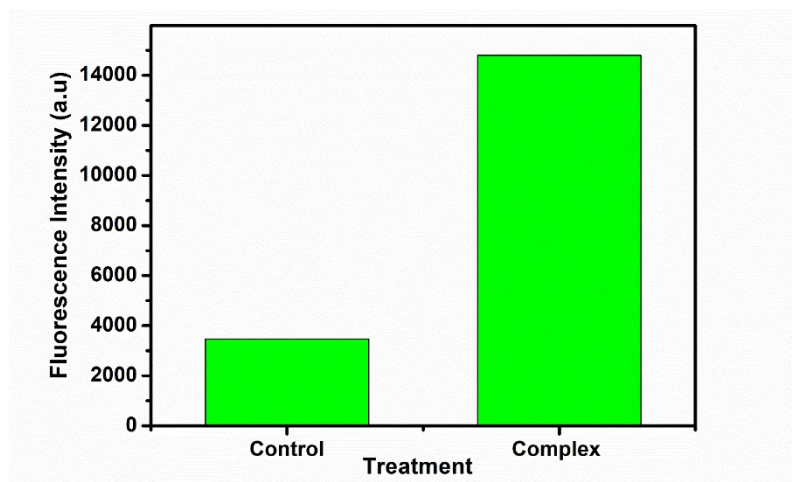

Figure S21. Fluorescent intensity plot of DCFDA/DCF assay performed for the detection of ROS generation in MCF7 cells by complex 1 compared with untreated control.

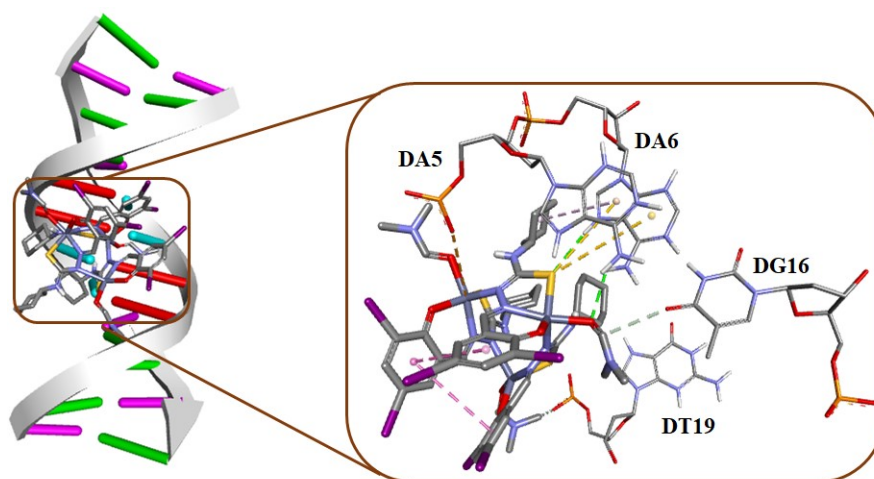

Figure S22. Binding mode of  $[Zn_3(\mu-L)_3 \cdot 3DMF]$  (1) and its focused view of interactions with 1BNA.

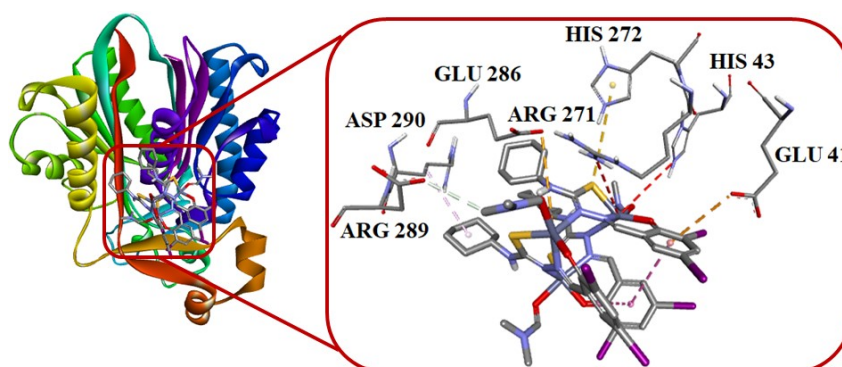

Figure S23. Binding mode of  $[Zn_3(\mu-L)_3 \cdot 3DMF]$  (1) and its focused view of interactions with 1HNJ.

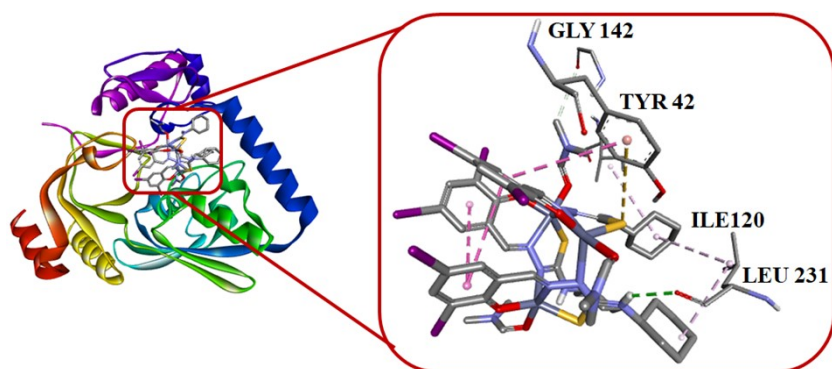

Figure S24. Binding mode of  $[Zn_3(\mu-L)_3 \cdot 3DMF]$  (1) and its focused view of interactions with 1HSK.

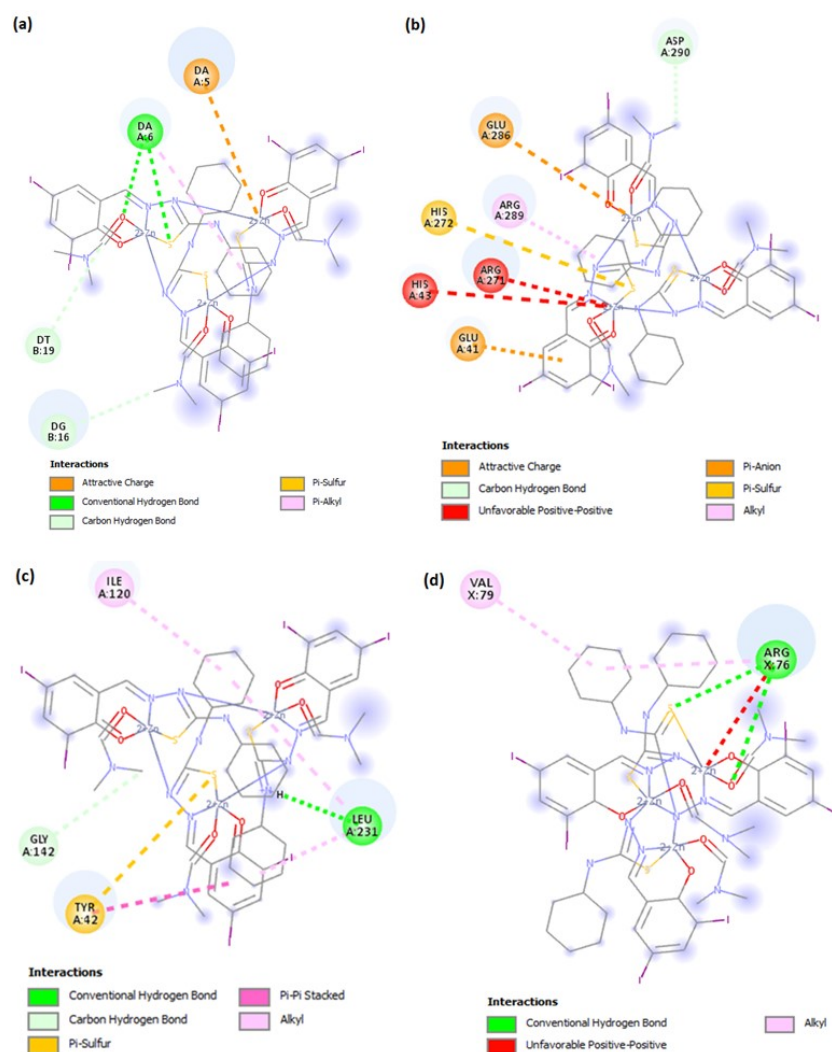

Figure S25. 2D representation of  $[Zn_3(\mu-L)_3 \cdot 3DMF]$  (1) with the active site residues of (a) 1BNA, (b) 1HNJ, (c) 1HSK and (d) 3HB5.

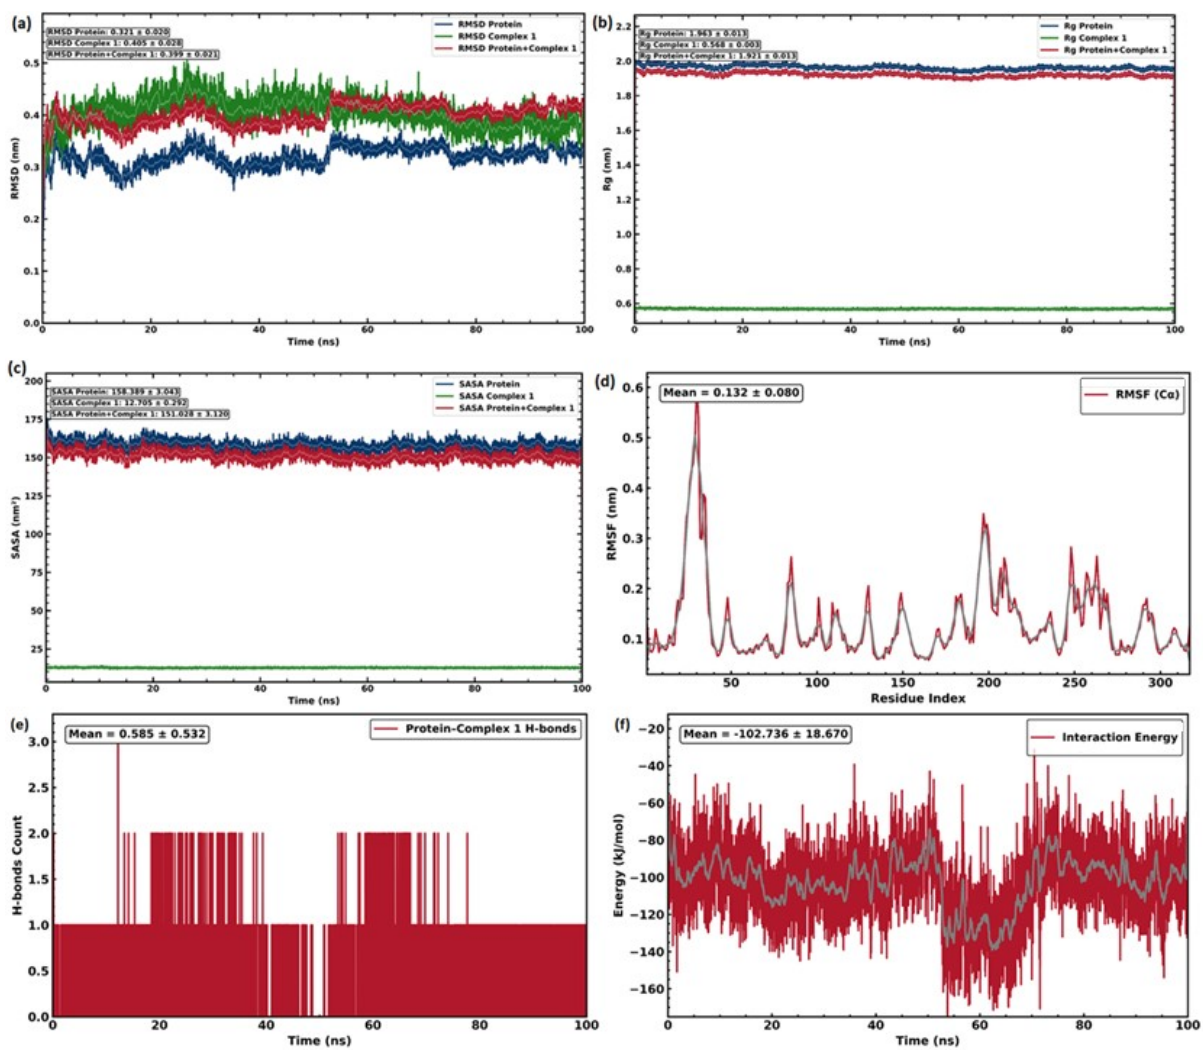

Figure S26. MD simulation profile of the Complex 1-1HNJ system over 100 ns (a) RMSD (b) Rg (c) SASA (d) RMSF (e) hydrogen bonds (f) interaction energy.

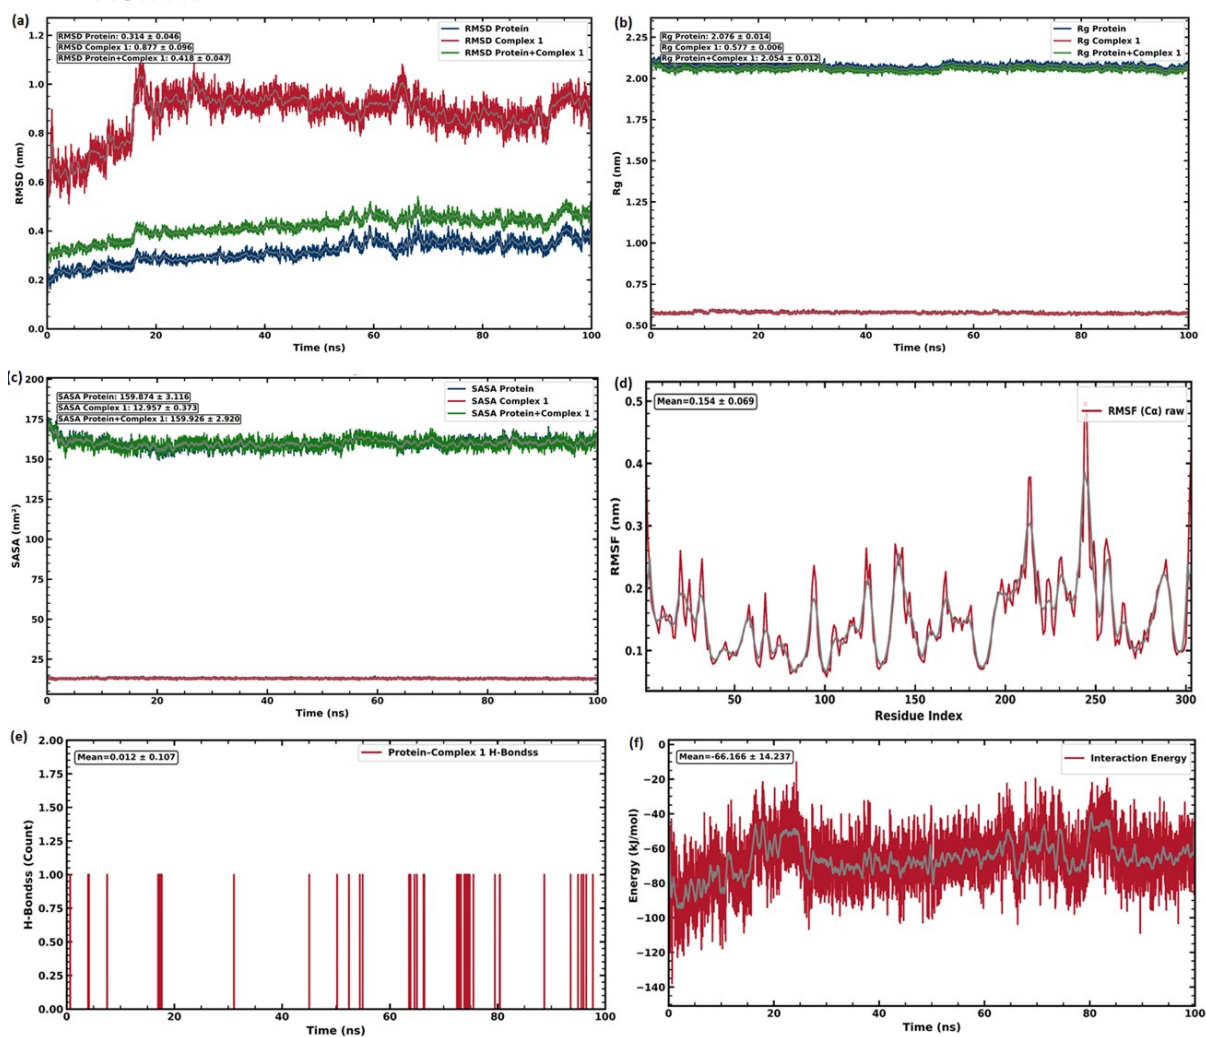

Figure S27. MD simulation profile of the Complex 1-IHSK system over 100 ns (a) RMSD (b) Rg (c) SASA (d) RMSF (e) hydrogen bonds (f) interaction energy.

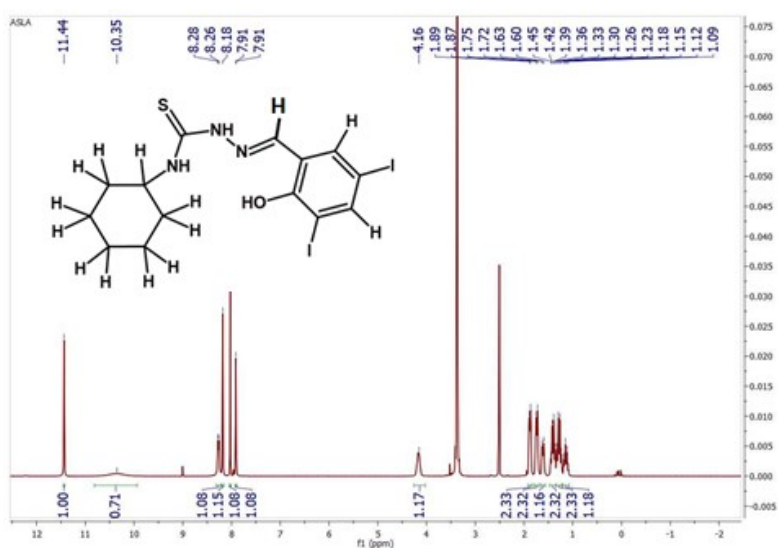

Figure S28. <sup>1</sup>H NMR spectrum of H<sub>2</sub>L.

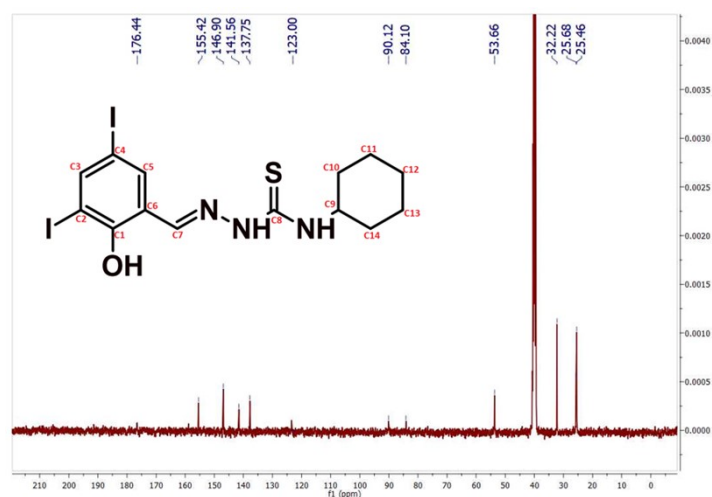

Figure S29.  $^{13}\text{C}$  NMR spectrum of  $\text{H}_2\text{L}$ .

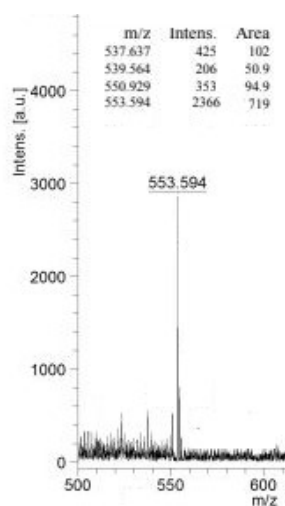

Figure S30. Mass spectrum of  $\text{H}_2\text{L}$ .

Table S1. The bond lengths ( $\text{\AA}$ ) and bond angles ( $^\circ$ ) of the complex  $[\text{Zn}_3(\mu\text{-L})_3\cdot 3\text{DMF}]$  (**1**).

| Bond lengths ( $\text{\AA}$ ) |            | Bond angles ( $^\circ$ ) |            |
|-------------------------------|------------|--------------------------|------------|
| Zn(1)–N(2)                    | 2.077(3)   | O(2)–Zn(1)–N(2)          | 113.35(11) |
| Zn(1)–N(7)                    | 2.106(3)   | O(2)–Zn(1)–N(7)          | 87.59(11)  |
| Zn(1)–S(2)                    | 2.3229(10) | N(2)–Zn(1)–N(7)          | 100.01(12) |
| Zn(1)–O(2)                    | 1.975(3)   | O(2)–Zn(1)–O(6)          | 88.78(11)  |
| Zn(1)–O(6)                    | 2.179(3)   | N(2)–Zn(1)–O(6)          | 93.34(11)  |
| Zn(2)–O(3)                    | 1.975(3)   | N(7)–Zn(1)–O(6)          | 166.53(11) |
| Zn(2)–O(5)                    | 2.120(3)   | O(2)–Zn(1)–S(2)          | 139.09(8)  |

|            |            |                 |            |
|------------|------------|-----------------|------------|
| Zn(2)–S(3) | 2.3551(10) | N(2)–Zn(1)–S(2) | 107.44(9)  |
| Zn(2)–N(8) | 2.091(3)   | N(7)–Zn(1)–S(2) | 82.40(8)   |
| Zn(2)–N(6) | 2.130(3)   | O(6)–Zn(1)–S(2) | 91.94(8)   |
| Zn(3)–O(4) | 2.113(3)   | O(3)–Zn(2)–N(8) | 115.14(11) |
| Zn(3)–O(1) | 1.983(3)   | O(3)–Zn(2)–O(5) | 90.43(11)  |
| Zn(3)–S(1) | 2.3545(10) | N(8)–Zn(2)–O(5) | 92.79(11)  |
| Zn(3)–N(1) | 2.094(3)   | O(3)–Zn(2)–N(6) | 87.53(11)  |
| Zn(3)–N(5) | 2.096(3)   | N(8)–Zn(2)–N(6) | 98.49(12)  |
| N(7)–N(8)  | 1.396(4)   | O(3)–Zn(2)–S(3) | 135.12(8)  |
| N(6)–N(5)  | 1.395(4)   | N(8)–Zn(2)–S(3) | 109.31(9)  |
| N(1)–N(2)  | 1.396(4)   | O(5)–Zn(2)–S(3) | 93.38(8)   |
| S(1)–C(8)  | 1.740(4)   | N(6)–Zn(2)–S(3) | 80.07(8)   |
| S(2)–C(36) | 1.737(4)   | O(5)–Zn(2)–N(6) | 168.32(11) |
| S(3)–C(22) | 1.744(4)   | O(1)–Zn(3)–N(1) | 87.19(11)  |
| C(8)–N(2)  | 1.336(5)   | O(1)–Zn(3)–N(5) | 116.55(12) |
| N(5)–C(22) | 1.337(5)   | N(1)–Zn(3)–N(5) | 97.96(12)  |
| N(8)–C(36) | 1.345(5)   | O(1)–Zn(3)–O(4) | 89.93(10)  |

Table S2. Interaction parameters of the complex  $[\text{Zn}_3(\mu\text{-L})_3\cdot 3\text{DMF}]$  (**1**).

| Hydrogen bonding interactions     |         |                  |          |                    |
|-----------------------------------|---------|------------------|----------|--------------------|
| D–H $\cdots$ A                    | D–H (Å) | H $\cdots$ A (Å) | D–A (Å)  | D–H $\cdots$ A (°) |
| N3–H3A $\cdots$ O6                | 0.84(4) | 2.17(4)          | 2.959(5) | 156(4)             |
| N4–H4A $\cdots$ O4                | 0.84(5) | 2.46(6)          | 3.316(5) | 138(5)             |
| N9–H9A $\cdots$ O5                | 0.85(3) | 2.16(3)          | 2.957(5) | 157(4)             |
| C7–H7 $\cdots$ O2                 | 0.95    | 2.40             | 3.294(4) | 157                |
| C9–H9 $\cdots$ S1                 | 1.00    | 2.65             | 3.060(4) | 105                |
| C21–H21 $\cdots$ O1               | 0.95    | 2.50             | 3.348(5) | 149                |
| C35–H35 $\cdots$ O3               | 0.95    | 2.46             | 3.352(5) | 157                |
| C42–H42 <sup>B</sup> $\cdots$ S2  | 0.99    | 2.76             | 3.365(4) | 120                |
| C43–H43 $\cdots$ O2               | 0.95    | 2.33             | 2.942(5) | 122                |
| C44–H44A $\cdots$ I1 <sup>a</sup> | 0.98    | 2.86             | 3.837(4) | 177                |
| C44–H44B $\cdots$ I6 <sup>a</sup> | 0.98    | 2.86             | 3.819(4) | 166                |
| C46–H46 $\cdots$ O3               | 0.95    | 2.48             | 3.042(5) | 118                |
| C49–H49 $\cdots$ O1               | 0.95    | 2.33             | 2.935(5) | 121                |

D = donor, A = acceptor, Equivalent position codes a = x,1-y,2-z.

| C–X $\cdots$ $\pi$ interactions     |                   |                   |                     |
|-------------------------------------|-------------------|-------------------|---------------------|
| C–X $\cdots$ Cg                     | X $\cdots$ Cg (Å) | C $\cdots$ Cg (Å) | C–X $\cdots$ Cg (°) |
| C5–H5 $\cdots$ Cg(11) <sup>a</sup>  | 2.78              | 3.629(4)          | 150                 |
| C15–H15 $\cdots$ Cg(7) <sup>a</sup> | 2.87              | 3.594(4)          | 134                 |
| C29–H29 $\cdots$ Cg(9) <sup>a</sup> | 2.95              | 3.742(4)          | 141                 |

Equivalent position codes: a= x,y,z; Cg(7)= C(1), C(2), C(3), C(4), C(5), C(6); Cg(9)= C(15), C(16), C(17), C(18), C(19), C(20); Cg(11)= C(29), C(30), C(31), C(32), C(33), C(34).

Table S3. The Frontier molecular orbital energies and calculated chemical reactivity parameters for the ligand and complex.

| Energy parameters (eV)                    | <b>H<sub>2</sub>L</b> | <b>H<sub>2</sub>L-keto</b> | <b>1</b>   |
|-------------------------------------------|-----------------------|----------------------------|------------|
| HOMO                                      | -5.70                 | -6.04                      | -5.45      |
| HOMO-1                                    | -5.95                 | -6.25                      | -5.95      |
| LUMO                                      | -2.14                 | -3.32                      | -2.87      |
| LUMO+1                                    | -1.48                 | -1.36                      | -1.48      |
| E <sub>HOMO</sub> -E <sub>LUMO</sub> : ΔE | 3.55                  | 2.72                       | 2.58       |
| Ionization Energy, I                      | 5.70                  | 6.04                       | 5.45       |
| Electron Affinity, A                      | 2.14                  | 3.32                       | 2.87       |
| Chemical hardness, η                      | 1.78                  | 1.36                       | 1.29       |
| Electronegativity, χ                      | 3.92                  | 4.68                       | 4.16       |
| Chemical potential, μ                     | -3.92                 | -4.68                      | -4.16      |
| Electrophilicity, ω                       | 4.31                  | 8.05                       | 6.70       |
| Total Energy                              | -32772.12             | -32804.77                  | -123877.59 |
| Global softness, σ (eV <sup>-1</sup> )    | 0.56                  | 0.73                       | 0.77       |
| Nucleophilicity, ε (eV <sup>-1</sup> )    | 0.23                  | 0.12                       | 0.12       |
| Dipole moment (Debye)                     | 8.20                  | 4.99                       | 12.07      |

Table S4. Results of the inhibitory zones of the ligand and complex **1**.

| Compounds             | Zone of Inhibition (mm) |                |                 |                      |                     |
|-----------------------|-------------------------|----------------|-----------------|----------------------|---------------------|
|                       | <i>S. aureus</i>        | <i>E. coli</i> | <i>S. typhi</i> | <i>K. pneumoniae</i> | <i>P. mirabilis</i> |
| <b>H<sub>2</sub>L</b> | 17±1                    | 11±1           | 0               | 11.33±1.52           | 0                   |
| <b>1</b>              | 33±1.73                 | 23±1           | 26.67±1.53      | 23±1                 | 20.67±1.53          |
| Ciprofloxacin         | 27.33±0.57              | 29.67±0.57     | 27.67±1.15      | 32±1                 | 29.33±1.52          |

Table S5. The percentage of cell viability of MCF-7 cell with the concentrations of ligand H<sub>2</sub>L and complex **1**.

| Samples               | Concentration (μg/mL) | Average Absorbance @ | % Cell Viability |
|-----------------------|-----------------------|----------------------|------------------|
|                       |                       | 540 nm               | MCF-7            |
| <b>H<sub>2</sub>L</b> | Control               | 0.5766               | 100              |
|                       | 6.25                  | 0.5561               | 96.44            |
|                       | 12.5                  | 0.4686               | 81.26            |
|                       | 25                    | 0.3782               | 65.59            |
|                       | 50                    | 0.3098               | 53.73            |
|                       | 100                   | 0.2467               | 42.79            |
|                       | 6.25                  | 0.4800               | 83.25            |
|                       | 12.5                  | 0.48087              | 70.88            |

|                  |     |        |       |
|------------------|-----|--------|-------|
| <b>Complex 1</b> | 25  | 0.2373 | 41.15 |
|                  | 50  | 0.1772 | 30.73 |
|                  | 100 | 0.1096 | 19.01 |

Table S6. Physicochemical properties and in silico ADMET profile of **1**.

| Properties                                                                                                                                                                                                                                                                                                                                                                                                                                                                                                                                                                                                                                                                                                                                                                                                                                                                                                                                                                                                                                                                                                                                     | Complex 1 |
|------------------------------------------------------------------------------------------------------------------------------------------------------------------------------------------------------------------------------------------------------------------------------------------------------------------------------------------------------------------------------------------------------------------------------------------------------------------------------------------------------------------------------------------------------------------------------------------------------------------------------------------------------------------------------------------------------------------------------------------------------------------------------------------------------------------------------------------------------------------------------------------------------------------------------------------------------------------------------------------------------------------------------------------------------------------------------------------------------------------------------------------------|-----------|
| <b>Physicochemical and medicinal properties</b>                                                                                                                                                                                                                                                                                                                                                                                                                                                                                                                                                                                                                                                                                                                                                                                                                                                                                                                                                                                                                                                                                                |           |
| MW                                                                                                                                                                                                                                                                                                                                                                                                                                                                                                                                                                                                                                                                                                                                                                                                                                                                                                                                                                                                                                                                                                                                             | 1996.84   |
| TPSA                                                                                                                                                                                                                                                                                                                                                                                                                                                                                                                                                                                                                                                                                                                                                                                                                                                                                                                                                                                                                                                                                                                                           | 581.945   |
| LogP <sub>o/w</sub>                                                                                                                                                                                                                                                                                                                                                                                                                                                                                                                                                                                                                                                                                                                                                                                                                                                                                                                                                                                                                                                                                                                            | 11.064    |
| <b>Absorption</b>                                                                                                                                                                                                                                                                                                                                                                                                                                                                                                                                                                                                                                                                                                                                                                                                                                                                                                                                                                                                                                                                                                                              |           |
| Caco-2 Permeability                                                                                                                                                                                                                                                                                                                                                                                                                                                                                                                                                                                                                                                                                                                                                                                                                                                                                                                                                                                                                                                                                                                            | 0.78      |
| HIA                                                                                                                                                                                                                                                                                                                                                                                                                                                                                                                                                                                                                                                                                                                                                                                                                                                                                                                                                                                                                                                                                                                                            | 85.25     |
| P-gp substrate                                                                                                                                                                                                                                                                                                                                                                                                                                                                                                                                                                                                                                                                                                                                                                                                                                                                                                                                                                                                                                                                                                                                 | 0.869     |
| <b>Distribution</b>                                                                                                                                                                                                                                                                                                                                                                                                                                                                                                                                                                                                                                                                                                                                                                                                                                                                                                                                                                                                                                                                                                                            |           |
| BBB                                                                                                                                                                                                                                                                                                                                                                                                                                                                                                                                                                                                                                                                                                                                                                                                                                                                                                                                                                                                                                                                                                                                            | -2.923    |
| FU                                                                                                                                                                                                                                                                                                                                                                                                                                                                                                                                                                                                                                                                                                                                                                                                                                                                                                                                                                                                                                                                                                                                             | 0.394     |
| <b>Metabolism</b>                                                                                                                                                                                                                                                                                                                                                                                                                                                                                                                                                                                                                                                                                                                                                                                                                                                                                                                                                                                                                                                                                                                              |           |
| CYP3A4 inhibitor                                                                                                                                                                                                                                                                                                                                                                                                                                                                                                                                                                                                                                                                                                                                                                                                                                                                                                                                                                                                                                                                                                                               | 1(yes)    |
| <b>Excretion</b>                                                                                                                                                                                                                                                                                                                                                                                                                                                                                                                                                                                                                                                                                                                                                                                                                                                                                                                                                                                                                                                                                                                               |           |
| CL <sub>plasma</sub>                                                                                                                                                                                                                                                                                                                                                                                                                                                                                                                                                                                                                                                                                                                                                                                                                                                                                                                                                                                                                                                                                                                           | -34.217   |
| <b>Toxicity</b>                                                                                                                                                                                                                                                                                                                                                                                                                                                                                                                                                                                                                                                                                                                                                                                                                                                                                                                                                                                                                                                                                                                                |           |
| Human hepatotoxicity (H-HT)                                                                                                                                                                                                                                                                                                                                                                                                                                                                                                                                                                                                                                                                                                                                                                                                                                                                                                                                                                                                                                                                                                                    | No        |
| <p>Note. <b>MW</b>: molecular weight (<math>\leq 500</math> g/mol), <b>TPSA</b>: topological polar surface area (<math>\text{\AA}^2</math>), <b>LogP</b>: logarithm of partition coefficient (<math>\leq 5</math>) of compound between n-octanol and water, <b>HIA</b>: Human intestinal absorption (<math>\text{HIA} + &lt; 30\% &lt; \text{HIA}</math>-), <b>P-gp</b>: P-glycoprotein inhibitor/ substrate (0 to 0.3, excellent; 0.3 to 0.7, medium; 0.7 to 1.0, poor), <b>BBB</b>: Blood-Brain Barrier penetration (<math>\sim 1</math>: BBB+; <math>\sim 0</math>: BBB-), <b>FU</b>: Fraction unbound in plasmas (Low; <math>&lt; 5\%</math>, Middle; <math>5 \sim 20\%</math>, High; <math>&gt; 20\%</math>), <b>CYP3A4 inhibitor</b>: Cytochrome P450 monooxygenase enzyme (<math>\sim 1</math>; inhibitor, <math>\sim 0</math>; non-inhibitor), <b>CL<sub>plasma</sub></b>: ml/min/kg. <math>&gt; 15</math> ml/min/kg; high clearance, <math>5 \sim 15</math> ml/min/kg; moderate clearance, <math>&lt; 5</math> ml/min/kg; low clearance, <b>H-HT</b>: Human hepatotoxicity (0 to 0.3, low; 0.3 to 0.7, medium; 0.7 to 1.0, high).</p> |           |
